# Supplementary material for: CHPF Regulates the Aggressive Phenotypes of Hepatocellular Carcinoma Cells via the Modulation of the Decorin and TGF-β Pathways
Source: PubMed Central journal article supplement (PMC8002199; doi:10.3390/cancers13061261), 2021-03-12
Supplement: cancers-13-01261-s001.pdf [file cancers-13-01261-s001.pdf]

# CHPF Regulates the Aggressive Phenotypes of Hepatocellular Carcinoma Cells via the Modulation of the Decorin and TGF- $\beta$ Pathways

Chiung-Hui Liu, Bo-Rui Wu, Ying-Jui Ho, Yin-Hung Chu, Wei-Cheng Hsu, To-Jung Tseng, Ju-Pi Li and Wen-Chieh Liao

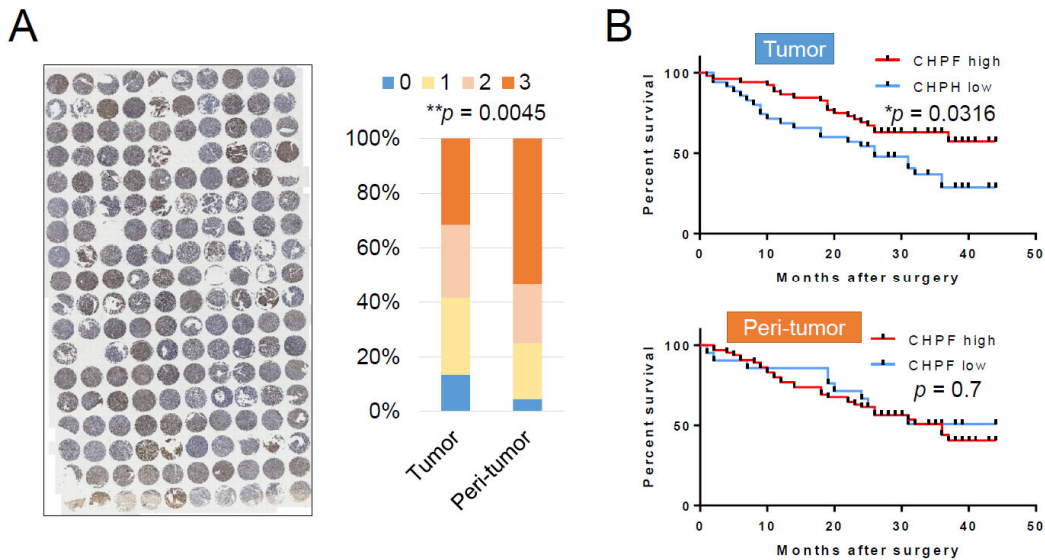

**Figure S1.** (A) Immunohistochemistry of CHPF in a paraffin-embedded human HCC tissue microarray. The results were scored based on the percentage of positive cells in the tumor and peri-tumor tissue (0, <5%; 1, 5 to 20%; 2, 20% to 50%; 3, >50%).  $p = 0.0045$ . (B) Kaplan-Meier analysis of overall survival for patients with HCC. The analyses were conducted according to the immunohistochemistry of CHPF. Grade 0 and 1 for low expression; Grade 2 and 3 for high expression. Log-rank test.  $p = 0.0316$ ;  $p = 0.7$ .

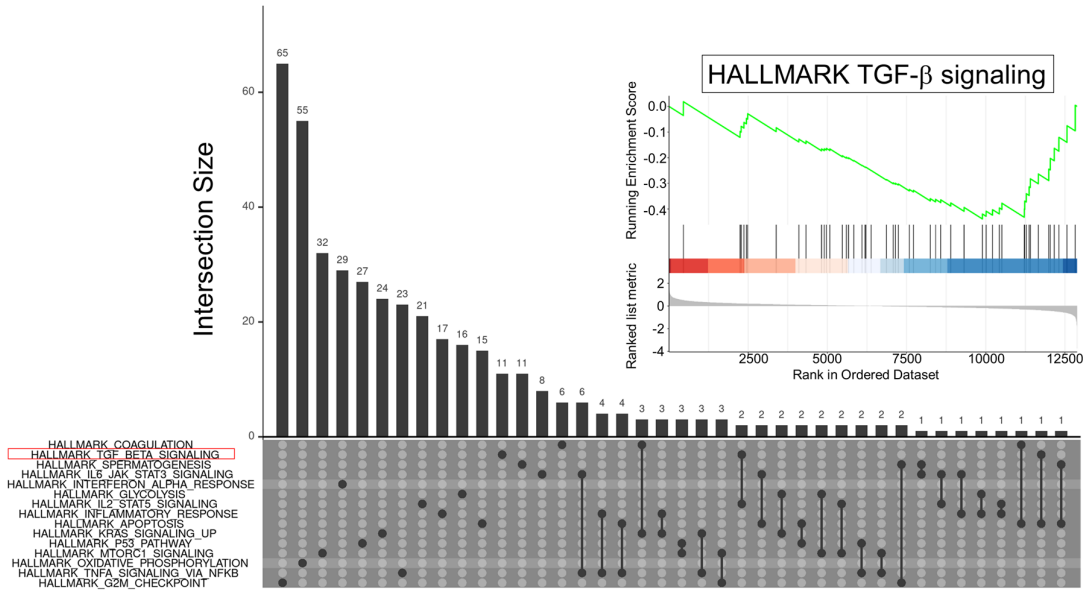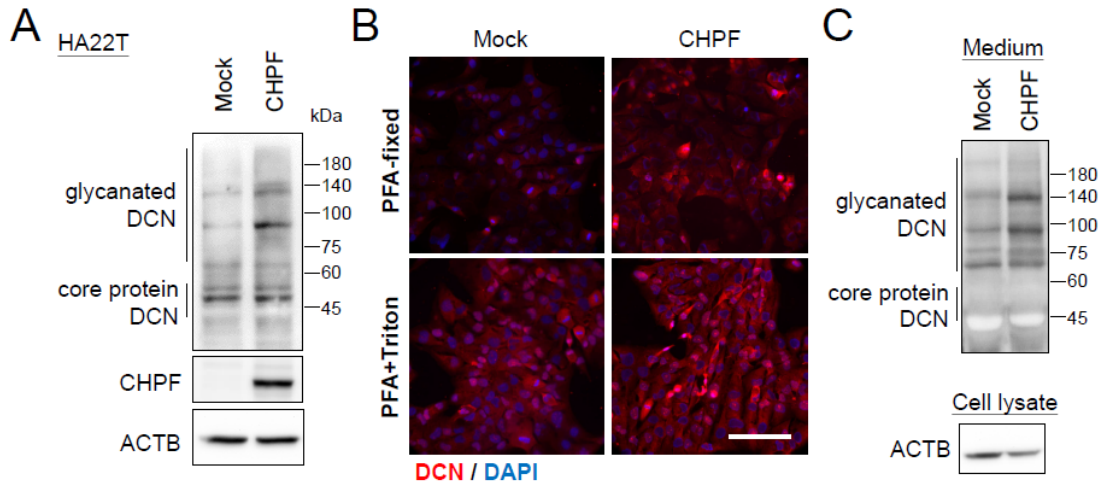

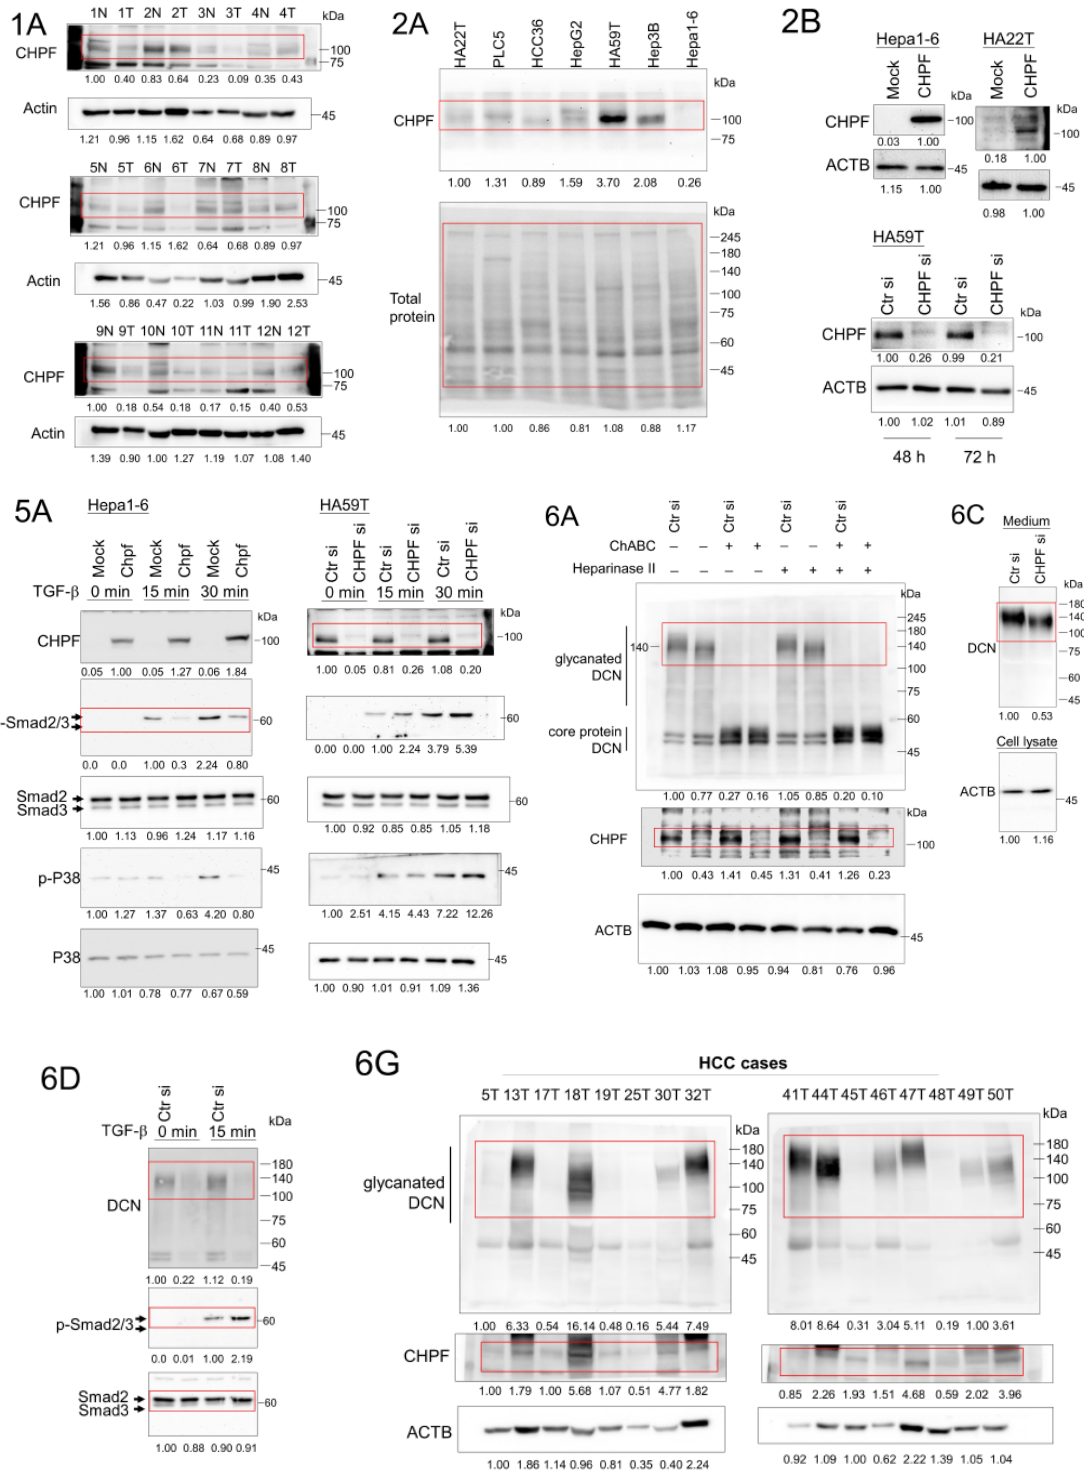

Detail information about Figures 1,2,5,6.

**Table S1.** Correlation of CHPF expression with clinicopathological features of HCC tissue array.

| Factor       | Feature    | CHPF Expression |      | <i>p</i> Value (Two-Sided Fisher's Exact Test) |
|--------------|------------|-----------------|------|------------------------------------------------|
|              |            | Low             | High |                                                |
| Tissue types | Non-tumor  | 22              | 66   | 0.0045*                                        |
|              | Tumor      | 37              | 52   |                                                |
| Sex          | Male       | 29              | 45   | 1.00                                           |
|              | Female     | 6               | 9    |                                                |
| Age          | < 55 years | 20              | 24   | 0.2820                                         |
|              | ≥ 55 years | 15              | 30   |                                                |
| Tumor stage  | T1 + T2    | 17              | 34   | 0.2433                                         |
|              | T3 + T4    | 15              | 16   |                                                |
| Metastasis   | No         | 35              | 54   | 1.00                                           |
|              | Yes        | 0               | 0    |                                                |

\* $p < 0.05$  was considered as statistically significant.
